# Supplementary material for: Metal-Formate Framework Stiffening and Its Relevance to Phase Transition Mechanism
Source: MDPI journal article supplement (doi:10.3390/ma14206150), 2021-10-16
Supplement: s1 [file s1]

# Metal-formate framework stiffening and its relevance on phase transition mechanism

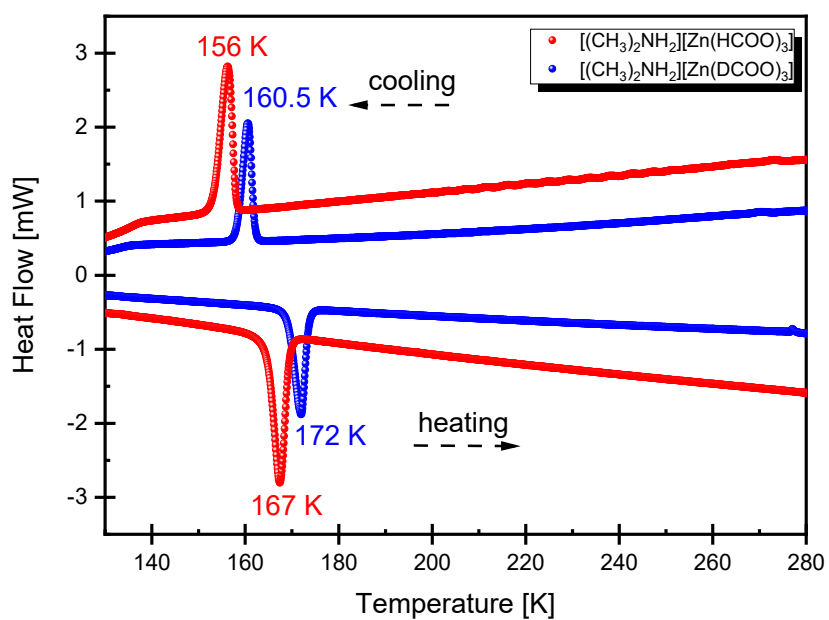

Figure S1 DSC data for **DMAZnF** and **DMAZnD** between 130 K and 280 K for cooling and heating run.

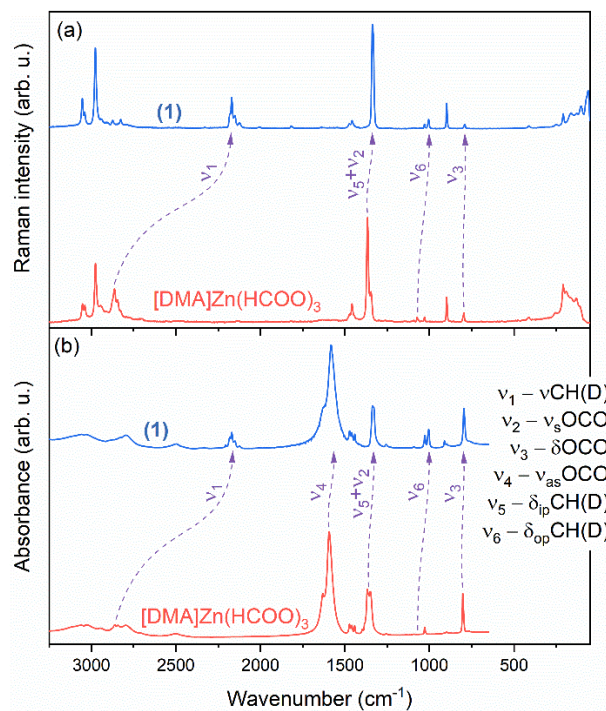

Figure S2 The RT Raman (a) and IR (b) spectra of **DMAZnD** compared to **DMAZnF**.

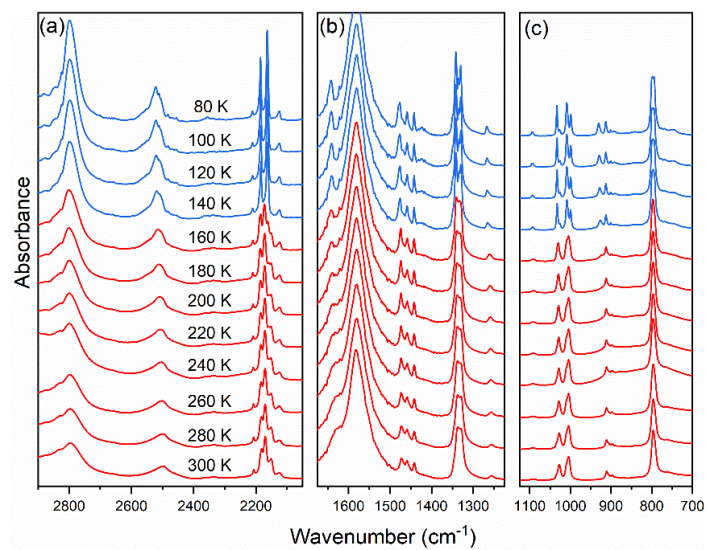

Figure S3 Thermal evolution of IR spectra measured for **DMAZnD**.

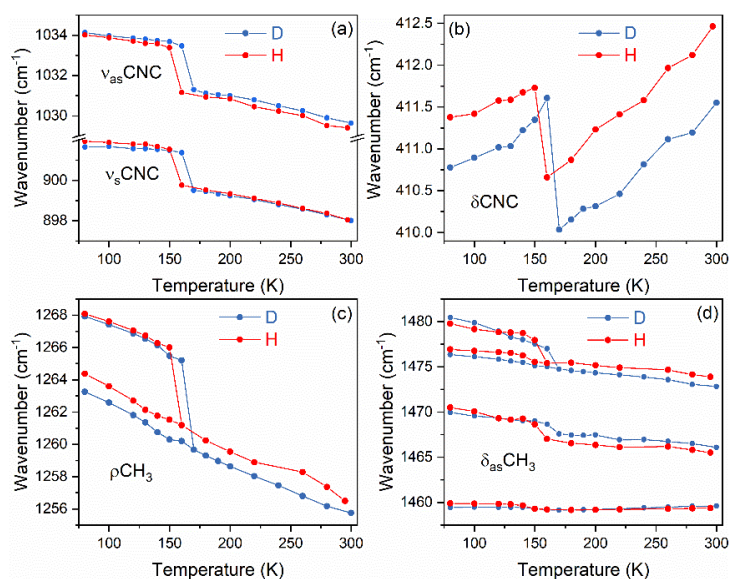

Figure S4 A comparison of temperature dependencies of Raman (a,b) and IR (c,d) bands, corresponding to  $\nu_{as}CNC$  and  $\nu_sCNC$  (a),  $\delta CNC$  (b),  $\rho CH_3$  (c), and  $\delta_{as}CH_3$  (d), for **DMAZnD** (D, blue) and **DMAZnF** (H, red) [1]; lines are guides for eyes.

**Tab. S1.** The wavenumbers ( $cm^{-1}$ ) along with intensity and proposed assignment of observed IR and Raman bands at RT and at 80 K for **DMAZnD**<sup>a</sup>

| Raman                      |                                       | IR                                |                                                       | Assignment     |
|----------------------------|---------------------------------------|-----------------------------------|-------------------------------------------------------|----------------|
| RT                         | 80 K                                  | RT                                | 80 K                                                  |                |
|                            |                                       | 3108sh                            | 3131w                                                 | overtone       |
| 3055m                      | 3050s                                 | 3059m                             | 3052w                                                 | $\nu_{as}CH_3$ |
| 3041w                      | 3036m, 3033m                          | 3032m                             |                                                       | $\nu_{as}CH_3$ |
|                            |                                       |                                   | 3004w                                                 | $\nu NH_2$     |
| 2977s, 2943w               | 2974vs, 2948m                         |                                   | 2975sh, 2952sh                                        | $\nu_sCH_3$    |
| 2911w, 2876w, 2827w        | 2909vw, 2898vw, 2875w, 2834vw, 2824vw | 2874sh, 2832sh                    | 2926w, 2903w, 2879w, 2845w, 2824w                     | overtone       |
| 2795b                      | 2787m                                 | 2794m                             | 2800m                                                 | $\nu NH_2$     |
|                            | 2526vw                                | 2500w, 2336vw                     | 2551sh, 2523w, 2512vw, 2483vw, 2474vw, 2369vw, 2340vw | overtone       |
| 2180w, 2173m, 2151w, 2124w | 2186m, 2161m, 2126w                   | 2207w, 2181w, 2171m, 2152m, 2125w | 2211w, 2186m, 2164m, 2125w                            | $\nu_1$        |
| 2005vw, 1817w              | 2009vw, 1822w                         | 2005vw                            | 2009vw, 1855vw                                        | overtone       |
| 1636vw                     | 1640vw                                | 1635s                             | 1644m, 1622m                                          | $\delta NH_2$  |

|                                               |                                                                                                  |                                       |                                                         |                                                                                                      |
|-----------------------------------------------|--------------------------------------------------------------------------------------------------|---------------------------------------|---------------------------------------------------------|------------------------------------------------------------------------------------------------------|
| 1587vw,<br>1547vw                             | 1573vw,<br>1546vw                                                                                | 1579vs                                | 1581vs                                                  | v <sub>4</sub>                                                                                       |
| 1474w,<br>1458w                               | 1482w, 1477sh,<br>1458w                                                                          | 1473m,<br>1466sh, 1459m               | 1481sh,<br>1476m, 1470sh,<br>1459m                      | δ <sub>as</sub> CH <sub>3</sub>                                                                      |
|                                               | 1442vw<br>1432vw                                                                                 | 1442m                                 | 1442m<br>1424m                                          | ωNH <sub>2</sub> +δ <sub>s</sub> CH <sub>3</sub><br>τNH <sub>2</sub> +δ <sub>s</sub> CH <sub>3</sub> |
| 1337vs<br>1332sh<br>1236vw,<br>1093vw         | 1341sh, 1338vs<br>1332s, 1318vw<br>1232vw,<br>1094vw, 1054vw                                     | 1337vs<br>1330vs<br>1256w,<br>1092vw  | 1349sh, 1342s<br>1335s, 1331s<br>1268w, 1263sh<br>1094w | v <sub>2</sub><br>v <sub>5</sub><br>ρCH <sub>3</sub>                                                 |
| 1030w<br>1006w                                | 1034w<br>1009w, 999w<br>931vw, 915vw                                                             | 1028m<br>1100sh, 1005m<br>906sh, 910w | 1033m, 1026w<br>1009m, 999m<br>930w, 913w               | v <sub>as</sub> CNC<br>v <sub>6</sub><br>ρNH <sub>2</sub>                                            |
| 898m                                          | 902m, 892vw                                                                                      | 897vw                                 | 901w, 893vw<br>800s, 798s,<br>795s                      | v <sub>s</sub> CNC<br>v <sub>3</sub>                                                                 |
| 796sh, 790w                                   | 797sh, 791w                                                                                      | 796s, 761vw                           |                                                         | δCNC<br>τCH <sub>3</sub>                                                                             |
| 412w                                          | 411w<br>334w<br>267w, 253vw,<br>225vw, 210m, 196w,                                               |                                       |                                                         |                                                                                                      |
| 249w, 209w,<br>164w, 129w,<br>102m, 69sh, 59m | 175m, 166sh, 157m,<br>139sh, 134m, 129sh,<br>120sh, 112sh, 108m,<br>104sh, 94w, 79m,<br>63w, 54m |                                       |                                                         | lattice modes                                                                                        |

<sup>a</sup>Key: vs, very strong; s, strong; m, medium; w, weak; vw, very weak; sh, shoulder; s, symmetric; as, antisymmetric; v, stretching; δ, bending (scissoring); ρ, rocking; τ, twisting; ω, wagging; v<sub>1</sub>, CH (CD) stretching; v<sub>2</sub>, symmetric OCO stretching; v<sub>3</sub>, OCO bending; v<sub>4</sub>, antisymmetric OCO stretching; v<sub>5</sub>, in-plane CH (CD) bending; v<sub>6</sub>, out-of-plane CH (CD) bending

## References

- [1] Mączka M, Ptak M and Macalik L 2014 Infrared and Raman studies of phase transitions in metal–organic frameworks of [(CH<sub>3</sub>)<sub>2</sub>NH<sub>2</sub>][M(HCOO)<sub>3</sub>] with M=Zn, Fe *Vib. Spectrosc.* **71** 98–104
